# Supplementary material for: Activation of TRPV4 Induces Exocytosis and Ferroptosis in Human Melanoma Cells
Source: MDPI journal article supplement (doi:10.3390/ijms23084146), 2022-04-08
Supplement: s1 [file s1]

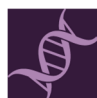

Supplementary data

## Activation of TRPV4 Induces Exocytosis and Ferroptosis in Human Melanoma Cells

Mei Li <sup>†</sup>, Jiaojiao Zheng <sup>†</sup>, Tian Wu <sup>†</sup>, Yulin He <sup>†</sup>, Jing Guo, Jiao Xu, Chuanzhou Gao, Shuxian Qu, Qianyi Zhang, Jiayu Zhao and Wei Cheng <sup>\*</sup>

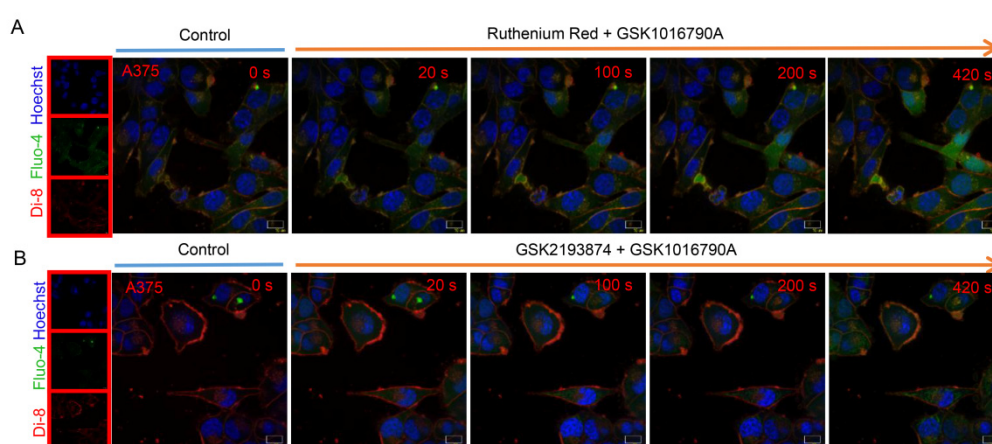

**Supplementary Figure S1.** Cell exocytosis in A375 cells targets TRPV4 pathway. (A) Scanning disk confocal images for time-lapse in A375 cells upon GSK1016790A (20 nM) addition with pretreatment of ruthenium red (10  $\mu$ M), a common inhibitor of TRPV ion channels. Scale bar, 10  $\mu$ m. (B) Scanning disk confocal images for time-lapse in A375 cells upon GSK1016790A (20 nM) addition with pretreatment of GSK2193874 (8 nM), an antagonist of TRPV4 ion channel. Scale bar, 10  $\mu$ m.

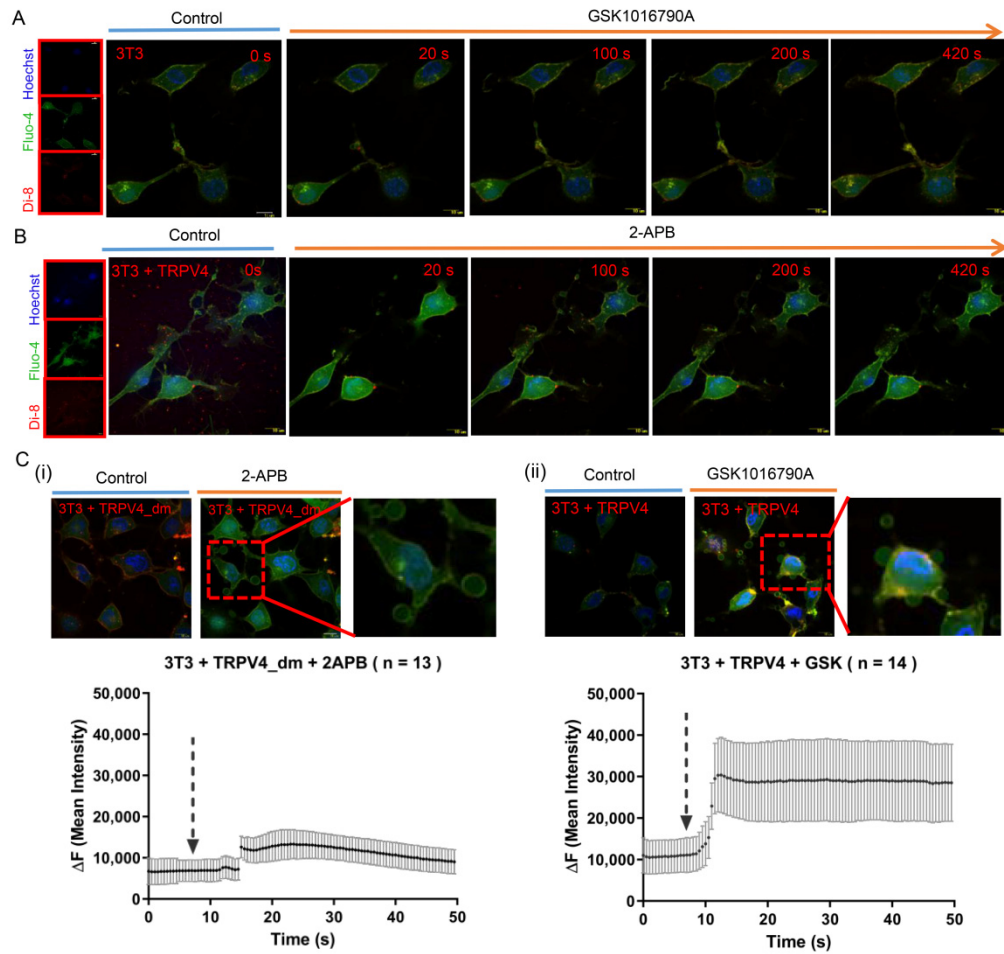

**Supplementary Figure S2.** Activation of TRPV4 induces cell exocytosis in exogenous expressing system. **(A)** Time-lapse of scanning disk confocal images of 3T3 cells transiently transfected with vector upon GSK1016790A (20 nM) application. **(B)** Time-lapse of scanning disk confocal images of 3T3 cells transfected with TRPV4 upon 2-APB (50  $\mu$ M) application. **(C)** Representative scanning disk confocal images (upper row) and calcium imaging (lower row) of heterogenous TRPV4 mutation **(i)**, as well as TRPV4 **(ii)** expressing in 3T3 cells upon 2-APB (50  $\mu$ M) **(i)** and GSK1016790A (20 nM) **(ii)** application.

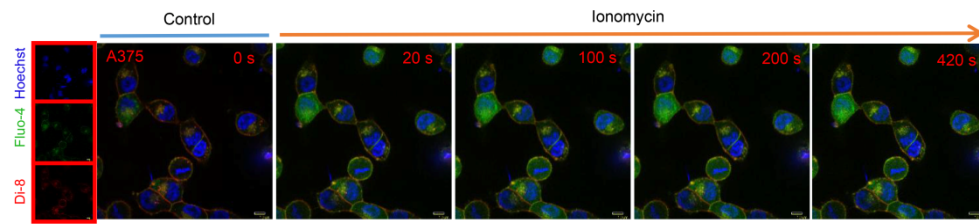

**Supplementary Figure S3.** Calcium entry alone does not induce cell exocytosis in A375 cells. Time-lapse of scanning disk confocal images for A375 cells upon application of ionomycin (1  $\mu\text{M}$ ), an effective  $\text{Ca}^{2+}$  ionophore. Scale bar, 10  $\mu\text{m}$ .

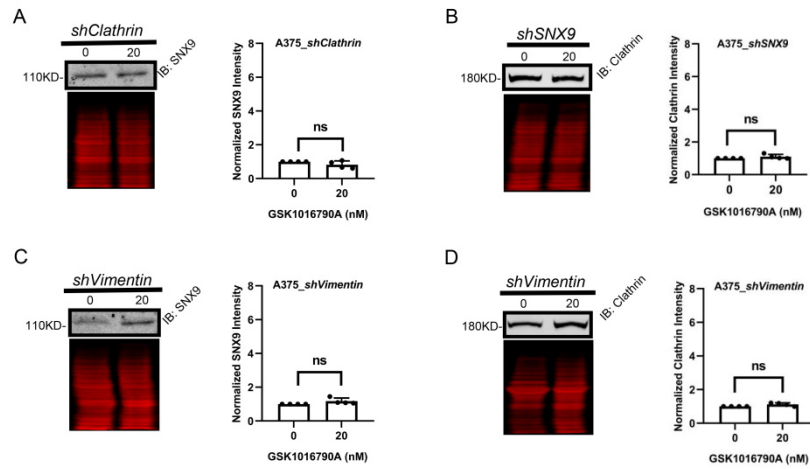

**Supplementary Figure S4.** The interplay among folding and vesicle trafficking proteins aids vesicles transduction of exocytosis. Western blot probed for SNX9 in A375 cells with *shclathrin* (A) and clathrin with *shSNX9* (B) treated with GSK1016790A (20 nM). Target protein quantification was normalized to total protein. Western blot probed for SNX9 (C) or clathrin (D) in A375 cells with *shvimentin* exposed to GSK1016790A (20 nM). Target protein quantification was normalized to total protein. Data are presented as mean  $\pm$  SD of at least three independent experiments, *t*-test, ns indicates no significance.
